# Supplementary material
Source: PubMed Central journal article supplement (PMC3911086)
Supplement: AEM.02657-13_zam999105031so1.pdf [file AEM.02657-13_zam999105031so1.pdf]

1 **Supplementary Data**

2 ***Hamiltonella* symbiont titre**

3 While the majority of data for this study was collected in 2011, quantification of  
4 symbiont populations with increasing maternal age was carried out in 2012. It was noted  
5 at the start of the year that *Hamiltonella* densities for the *Hamiltonella* 1 line were  
6 significantly lower than previously recorded. To confirm when this drop in symbiont  
7 density had occurred, historic samples of adults collected from the *Hamiltonella* 1 line  
8 were screened for symbiont quantification using qPCR (as described in Methods Section  
9 2.5), along with samples of the new *Hamiltonella* 2 line. For *Hamiltonella* 1, samples  
10 were screened from 2008, 2010, 2011 and 2012. For *Hamiltonella* 2, samples were  
11 screened from 2012. Three biological replicates were screened per line and year, although  
12 for 2011 only one suitable historic sample was available.

13 There was no significant difference in the secondary symbiont populations of  
14 *Hamiltonella* 1 samples collected in 2008, 2010 or 2011 (Figure S1, ANOVA,  $p = 0.598$ ),  
15 and these were grouped together for subsequent analysis. There was a significant effect of  
16 sample on *Hamiltonella* density (ANOVA,  $F_{2,8} = 199.22$ ,  $p < 0.0001$ ), with the  
17 *Hamiltonella* 1 2012 samples having significantly lower ( $p < 0.0001$ ) and the  
18 *Hamiltonella* 2 line having significantly higher ( $p = 0.0418$ ) *Hamiltonella* densities than  
19 the pooled historic *Hamiltonella* 1 samples (Figure S1).

20

21 **Figure and Table Legends**

22 **Figure S1.** Variation in *Hamiltonella* 1 symbiont density in historic aphid samples from  
23 2008-2012, compared to the *Hamiltonella* 2 line sampled in 2012. Symbiont density is

24 calculated as number of symbiont gene copies divided by number of aphid gene copies in  
25 the same sample (error bars are  $\pm 1$  s.e.m). Asterisks indicate statistically significant  
26 differences.

27

28 **Table S1.** Primer sequences used for qPCR of pea aphid primary and secondary  
29 symbionts, plus the primer for the Efl- $\alpha$  endogenous control aphid gene.

30

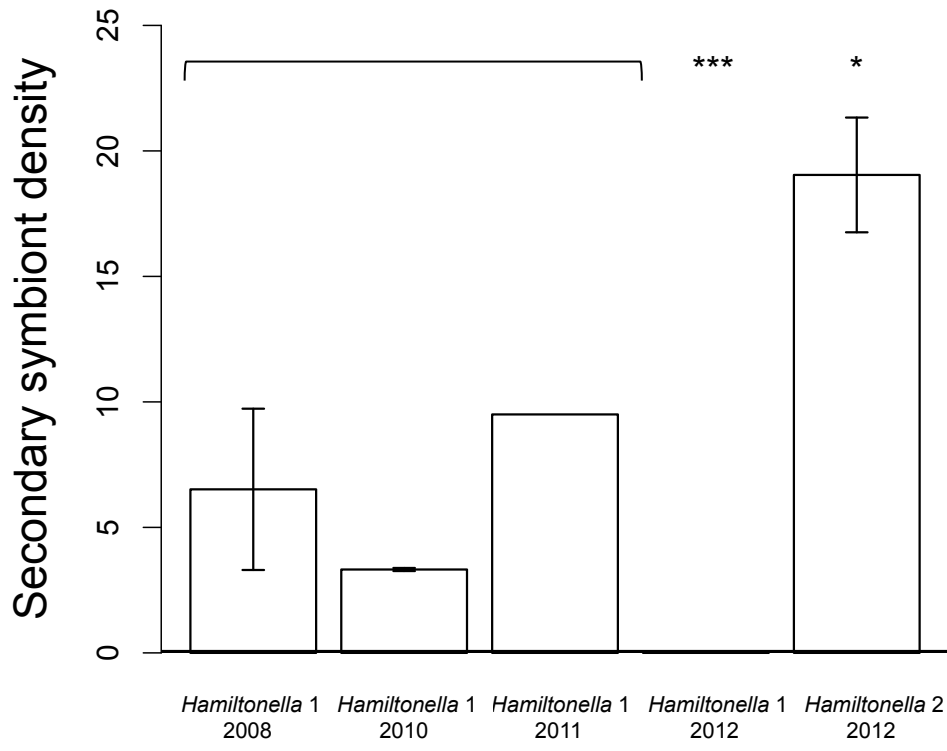

| Primer name   | Primer sequence              | Target                      |
|---------------|------------------------------|-----------------------------|
| rpsL1         | F: GCTGAATTAGGCTTTTTAGGTGTAG | <i>Buchnera aphidicola</i>  |
|               | R: CCTGCACAATCTAAGGAGCC      |                             |
| U70           | F: GATTTTCGCTTCTCTGCTG       | <i>Regiella insecticola</i> |
|               | R: ATACCCATCTCGGTGGTG        |                             |
| T70           | F: GGTCAGAAAAAAGTGGCAG       | <i>Hamiltonella defensa</i> |
|               | R: CGAGCGAAAGAGGAGTGA        |                             |
| R70           | F: TGGCGGGTGATGTGAAG         | <i>Serratia symbiotica</i>  |
|               | R: CGGGATAGTGGTGTTTTGG       |                             |
| Efl- $\alpha$ | F: CTGATTGTCCCGTCTTATTG      | Aphid endogenous control    |
|               | R: TATGGTGGTTCAGTAGAGTCC     |                             |

36

37
